# Supplementary material
Source: ML conference proceedings conference paper supplement (https://proceedings.neurips.cc/paper_files/paper/2023/hash/5a829e299ebc1c1615ddb09e98fb6ce8-Abstract.html)
Supplement: Supplementary file 1 [file 5a829e299ebc1c1615ddb09e98fb6ce8-Supplemental-Conference.zip]

Archive with 6 entries (6 files):
- code_1_point_pillar_cobevflow.py
- __MACOSX/._code_1_point_pillar_cobevflow.py
- code_2_cobevflow_matcher.py
- __MACOSX/._code_2_cobevflow_matcher.py
- Neurips23_CoBEVFlow_appendix.pdf
- __MACOSX/._Neurips23_CoBEVFlow_appendix.pdf
