# Supplementary material
Source: ML conference proceedings conference paper supplement (https://proceedings.neurips.cc/paper_files/paper/2023/hash/5a829e299ebc1c1615ddb09e98fb6ce8-Abstract.html)
Supplement: Supplementary file 1 [file 5a829e299ebc1c1615ddb09e98fb6ce8-Supplemental-Conference.zip › code_1_point_pillar_cobevflow.py]

from numpy import record
import torch.nn as nn

from opencood.models.sub_modules.pillar_vfe import PillarVFE
from opencood.models.sub_modules.point_pillar_scatter import PointPillarScatter
from opencood.models.sub_modules.base_bev_backbone import BaseBEVBackbone
from opencood.models.sub_modules.base_bev_backbone_resnet import ResNetBEVBackbone
from opencood.models.sub_modules.downsample_conv import DownsampleConv
from opencood.models.sub_modules.naive_compress import NaiveCompressor
from opencood.models.fuse_modules.where2comm_attn import Where2comm
from opencood.models.fuse_modules.raindrop_swin import raindrop_swin
from opencood.models.fuse_modules.raindrop_swin_w_single import raindrop_swin_w_single
from opencood.models.fuse_modules.raindrop_flow import raindrop_fuse
from opencood.utils.transformation_utils import tfm_to_pose, x1_to_x2, x_to_world
from opencood.tools.matcher import Matcher
from collections import OrderedDict
import torch
import numpy as np

def generate_noise(pos_std, rot_std, pos_mean=0, rot_mean=0):
    """ Add localization error to the 6dof pose
        Noise includes position (x,y) and rotation (yaw).
        We use gaussian distribution to generate noise.

    Args:

        pos_std : float 
            std of gaussian dist, in meter

        rot_std : float
            std of gaussian dist, in degree

        pos_mean : float
            mean of gaussian dist, in meter

        rot_mean : float
            mean of gaussian dist, in degree

    Returns:
        pose_noise: np.ndarray, [6,]
            [x, y, z, roll, yaw, pitch]
    """

    xy = np.random.normal(pos_mean, pos_std, size=(2))
    yaw = np.random.normal(rot_mean, rot_std, size=(1))

    pose_noise = np.array([xy[0], xy[1], 0, 0, yaw[0], 0])

    return pose_noise

def get_past_k_pairwise_transformation2ego(past_k_lidar_pose, noise_level, k=3, max_cav=5):
    """
    Get transformation matrixes accross different agents to curr ego at all past timestamps.

    Parameters
    ----------
    base_data_dict : dict
        Key : cav id, item: transformation matrix to ego, lidar points.
    
    ego_pose : list
        ego pose

    max_cav : int
        The maximum number of cav, default 5

    Return
    ------
    pairwise_t_matrix : np.array
        The transformation matrix each cav to curr ego at past k frames.
        shape: (L, k, 4, 4), L is the max cav number in a scene, k is the num of past frames
        pairwise_t_matrix[i, j] is T i_to_ego at past_j frame
    """
    pos_std = noise_level['pos_std']
    rot_std = noise_level['rot_std']
    pos_mean = 0 
    rot_mean = 0
    
    pairwise_t_matrix = np.tile(np.eye(4), (max_cav, k, 1, 1)) # (L, k, 4, 4)

    ego_pose = past_k_lidar_pose[0, 0]

    t_list = []

    # save all transformation matrix in a list in order first.
    for cav_id in range(past_k_lidar_pose.shape[0]):
        past_k_poses = []
        for time_id in range(k):
            loc_noise = generate_noise(pos_std, rot_std)
            past_k_poses.append(x_to_world(past_k_lidar_pose[cav_id, time_id].cpu().numpy()+loc_noise))
        t_list.append(past_k_poses) # Twx
    
    ego_pose = x_to_world(ego_pose.cpu().numpy())
    for i in range(len(t_list)): # different cav
        if i!=0 :
            for j in range(len(t_list[i])): # different time
                # i->j: TiPi=TjPj, Tj^(-1)TiPi = Pj
                # t_matrix = np.dot(np.linalg.inv(t_list[j]), t_list[i])
                t_matrix = np.linalg.solve(t_list[i][j], ego_pose)  # Tjw*Twi = Tji
                pairwise_t_matrix[i, j] = t_matrix
    pairwise_t_matrix = torch.tensor(pairwise_t_matrix).to(past_k_lidar_pose.device)
    return pairwise_t_matrix


class PointPillarWhere2commFlowTwoStageWDir(nn.Module):
    def __init__(self, args):
        super(PointPillarWhere2commFlowTwoStageWDir, self).__init__()

        # PIllar VFE
        self.pillar_vfe = PillarVFE(args['pillar_vfe'],
                                    num_point_features=4,
                                    voxel_size=args['voxel_size'],
                                    point_cloud_range=args['lidar_range'])
        self.scatter = PointPillarScatter(args['point_pillar_scatter'])
        # self.backbone = MaxResNetBEVBackbone(args['base_bev_backbone'], 64)
        if 'resnet' in args['base_bev_backbone'] and args['base_bev_backbone']['resnet']:
            self.backbone = ResNetBEVBackbone(args['base_bev_backbone'], 64)
        else:
            self.backbone = BaseBEVBackbone(args['base_bev_backbone'], 64)

        # used to downsample the feature map for efficient computation
        self.shrink_flag = False
        if 'shrink_header' in args:
            self.shrink_flag = True
            self.shrink_conv = DownsampleConv(args['shrink_header'])
        self.compression = False

        # if args['compression'] > 0:
        #     self.compression = True
        #     self.naive_compressor = NaiveCompressor(256, args['compression'])

        if 'num_sweep_frames' in args:    # number of frames we use in LSTM
            self.k = args['num_sweep_frames']
        else:
            self.k = 0

        if 'time_delay' in args:          # number of time delay
            self.tau = args['time_delay'] 
        else:
            self.tau = 0

        self.dcn = False
        # if 'dcn' in args:
        #     self.dcn = True
        #     self.dcn_net = DCNNet(args['dcn'])

        self.design_mode = 0
        if 'design_mode' in args.keys():
            self.design_mode = args['design_mode']
            print(f'=== design mode : {self.design_mode} ===')

        self.noise_flag = 0
        if 'noise' in args.keys():
            self.noise_flag = True
            self.noise_level = {'pos_std': args['noise']['pos_std'], 'rot_std': args['noise']['rot_std'], 'pos_mean': args['noise']['pos_mean'], 'rot_mean': args['noise']['rot_mean']}
            print(f'=== noise level : {self.noise_level} ===')

        self.num_roi_thres = -1
        if 'num_roi_thres' in args.keys():
            self.num_roi_thres = args['num_roi_thres']
            print(f'=== num_roi_thres : {self.num_roi_thres} ===')

        self.single_supervise = False
        if 'with_compensation' in args and args['with_compensation']:
            self.compensation = True
            if 'with_single_supervise' in args and args['with_single_supervise']:
                self.rain_fusion = raindrop_swin_w_single(args['rain_model'])
                self.single_supervise = True
            else:
                self.rain_fusion = raindrop_swin(args['rain_model'])
        else: 
            self.compensation = False
            self.rain_fusion = raindrop_fuse(args['rain_model'], self.design_mode)

        self.multi_scale = args['rain_model']['multi_scale']
        
        if self.shrink_flag:
            dim = args['shrink_header']['dim'][0]
            self.cls_head = nn.Conv2d(int(dim), args['anchor_number'],
                                    kernel_size=1)
            self.reg_head = nn.Conv2d(int(dim), 7 * args['anchor_number'],
                                    kernel_size=1)
            self.fused_cls_head = nn.Conv2d(int(dim), args['anchor_number'],
                                    kernel_size=1)
            self.fused_reg_head = nn.Conv2d(int(dim), 7 * args['anchor_number'],
                                    kernel_size=1)
        else:
            self.cls_head = nn.Conv2d(128 * 3, args['anchor_number'],
                                    kernel_size=1)
            self.reg_head = nn.Conv2d(128 * 3, 7 * args['anchor_number'],
                                    kernel_size=1)

        if 'dir_args' in args.keys():
            self.use_dir = True
            self.dir_head = nn.Conv2d(128 * 2, args['dir_args']['num_bins'] * args['anchor_number'],
                                    kernel_size=1) # BIN_NUM = 2， # 384
            self.fused_dir_head = nn.Conv2d(128 * 2, args['dir_args']['num_bins'] * args['anchor_number'],
                                    kernel_size=1)
        else:
            self.use_dir = False

        if self.design_mode == 0:
            self.matcher = Matcher('flow')
        else:
            self.matcher = Matcher('linear')

        self.backbone_fix_flag = False
        if 'backbone_fix' in args.keys() and args['backbone_fix']:
            self.backbone_fix_flag = True
            self.backbone_fix()
            print('=== backbone fixed ===')

        self.only_tune_header_flag = False
        if 'only_tune_header' in args.keys() and args['only_tune_header']:
            self.only_tune_header_flag = True
            self.only_tune_header()
            print('=== only tune header ===')

        self.viz_bbx_flag = False
        if 'viz_bbx_flag' in args.keys() and args['viz_bbx_flag']:
            self.viz_bbx_flag = True
        
        assert self.backbone_fix_flag == False or self.only_tune_header_flag == False, 'backbone_fix and only_tune_header cannot be True at the same time'
    
    def only_tune_header(self):
        """
        Fix the parameters of backbone during finetune on timedelay
        """
        for p in self.pillar_vfe.parameters():
            p.requires_grad = False

        for p in self.scatter.parameters():
            p.requires_grad = False

        for p in self.backbone.parameters():
            p.requires_grad = False

        for p in self.rain_fusion.parameters():
            p.requires_grad = False

        for p in self.matcher.parameters():
            p.requires_grad = False

        if self.compression:
            for p in self.naive_compressor.parameters():
                p.requires_grad = False
        if self.shrink_flag:
            for p in self.shrink_conv.parameters():
                p.requires_grad = False

        for p in self.cls_head.parameters():
            p.requires_grad = False
        for p in self.reg_head.parameters():
            p.requires_grad = False

    def backbone_fix(self):
        """
        Fix the parameters of backbone during finetune on timedelay
        """
        for p in self.pillar_vfe.parameters():
            p.requires_grad = False

        for p in self.scatter.parameters():
            p.requires_grad = False

        for p in self.backbone.parameters():
            p.requires_grad = False

        if self.compression:
            for p in self.naive_compressor.parameters():
                p.requires_grad = False
        if self.shrink_flag:
            for p in self.shrink_conv.parameters():
                p.requires_grad = False

        for p in self.cls_head.parameters():
            p.requires_grad = False
        for p in self.reg_head.parameters():
            p.requires_grad = False
    
    def regroup(self, x, record_len, k=1):
        cum_sum_len = torch.cumsum(record_len*k, dim=0)
        split_x = torch.tensor_split(x, cum_sum_len[:-1].cpu())
        return split_x

    def bandwidth_filter(self, input, num_box):
        topk_idx = torch.argsort(input['scores'], descending=True)[:num_box]

        output = {}
        output['scores'] = input['scores'][topk_idx]
        output['pred_box_3dcorner_tensor']  = input['pred_box_3dcorner_tensor'][topk_idx]
        output['pred_box_center_tensor'] = input['pred_box_center_tensor'][topk_idx]

        return output

    def generate_box_flow(self, data_dict, pred_dict, dataset, shape_list, device): 
        """
        data_dict : 

        pred_dict : 
            {
                psm_single_list: len = B, each element's shape is (N_b x k, 2, H, W) 
                rm_single_list: len = B, each element's shape is (N_b x k, 14, H, W) 
            }
        """
        # for b in range(B):
        # 1. get box results
        lidar_pose_batch = self.regroup(data_dict['past_lidar_pose'], data_dict['record_len'], k=1)
        past_k_time_diff = self.regroup(data_dict['past_k_time_interval'], data_dict['record_len'], k=3)
        anchor_box = data_dict['anchor_box'] # (H, W, 2, 7)
        psm_single_list = pred_dict['psm_single_list']
        rm_single_list = pred_dict['rm_single_list']
        dm_single_list = pred_dict['dm_single_list']

        # H, W = psm_single_list[0].shape[-2:]
        # shape_list = torch.tensor([64, H, W]).to(device)
        
        trans_mat_pastk_2_past0_batch = []
        B = len(lidar_pose_batch)
        box_flow_map_list = []
        reserved_mask_list = []

        if self.viz_bbx_flag:
            ori_reserved_mask_list = []
            single_box_results = None
        
        # for all batches
        for b in range(B):
            box_results = OrderedDict()
            psm_single = psm_single_list[b].reshape(-1, self.k, 2, psm_single_list[b].shape[-2], psm_single_list[b].shape[-1]) # (N_b, k, 2, H, W)
            rm_single = rm_single_list[b].reshape(-1, self.k, 14, rm_single_list[b].shape[-2], rm_single_list[b].shape[-1]) # (N_b, k, 14, H, W)
            if self.use_dir:
                dm_single = dm_single_list[b].reshape(-1, self.k, 4, dm_single_list[b].shape[-2], dm_single_list[b].shape[-1]) # (N_b, k, 4, H, W)

            cav_past_k_time_diff = past_k_time_diff[b]
            cav_trans_mat_pastk_2_past0 = []
            # for all cavs
            '''
            box_result : dict for each cav at each time
            {
                cav_idx : {
                    'past_k_time_diff' : 
                    [0] : {
                        pred_box_3dcorner_tensor: The prediction bounding box tensor after NMS. (n, 8, 3)
                        pred_box_center_tensor : (n, 7)
                        scores: (n, )
                    },
                    ...
                    [k-1] : { ... }
                }
            }
            '''
            for cav_idx in range(data_dict['record_len'][b]):
                # generate one cav's trans_mat_pastk_2_past0
                pastk_trans_mat_pastk_2_past0 = []
                for i in range(self.k):
                    unit_mat = x1_to_x2(lidar_pose_batch[b][cav_idx, i, :].cpu().numpy(), lidar_pose_batch[b][cav_idx, 0].cpu()) # (4, 4)
                    pastk_trans_mat_pastk_2_past0.append(unit_mat)
                pastk_trans_mat_pastk_2_past0 = torch.from_numpy(np.stack(pastk_trans_mat_pastk_2_past0, axis=0)).to(device) # (k, 4, 4)
                
                m_single = {}
                m_single['psm_single'] = psm_single[cav_idx]
                m_single['rm_single'] = rm_single[cav_idx]
                if self.use_dir:
                    m_single['dm_single'] = dm_single[cav_idx]
                # 1. generate one cav's box results
                box_results[cav_idx] = dataset.generate_pred_bbx_frames(m_single, pastk_trans_mat_pastk_2_past0, cav_past_k_time_diff[cav_idx*self.k:cav_idx*self.k+self.k], anchor_box)

            cav_trans_mat_pastk_2_past0.append(pastk_trans_mat_pastk_2_past0)
            
            # 2. generate box flow in one batch
            if self.viz_bbx_flag:
                box_flow_map, mask, ori_mask, matched_idx_list, compensated_results_list = self.matcher(box_results, shape_list=shape_list, viz_flag=self.viz_bbx_flag)
                ori_reserved_mask_list.append(ori_mask)
            else:
                box_flow_map, mask = self.matcher(box_results, shape_list=shape_list, viz_flag=self.viz_bbx_flag)
            box_flow_map_list.append(box_flow_map)
            reserved_mask_list.append(mask)

            if self.viz_bbx_flag:
                single_box_results = box_results
        
        final_flow_map = torch.concat(box_flow_map_list, dim=0)
        final_reserved_mask = torch.concat(reserved_mask_list, dim=0)

        if self.viz_bbx_flag:
            ori_reserved_mask = torch.concat(ori_reserved_mask_list, dim=0)
            return final_flow_map, final_reserved_mask, ori_reserved_mask, single_box_results, matched_idx_list, compensated_results_list

        return final_flow_map, final_reserved_mask

    def forward(self, data_dict, dataset=None):
        voxel_features = data_dict['processed_lidar']['voxel_features']         #(M, 32, 4)
        voxel_coords = data_dict['processed_lidar']['voxel_coords']             #(M, 4)
        voxel_num_points = data_dict['processed_lidar']['voxel_num_points']     #(M, )
        record_len = data_dict['record_len']
        record_frames = data_dict['past_k_time_interval']                       #(B, )
        pairwise_t_matrix = data_dict['pairwise_t_matrix']                      #(B, L, k, 4, 4)
        
        # debug = 0
        B, _, k, _, _ = pairwise_t_matrix.shape
        # for i in range(B):
        #     debug += record_len[i]*k

        batch_dict = {'voxel_features': voxel_features,
                      'voxel_coords': voxel_coords,
                      'voxel_num_points': voxel_num_points,
                      'record_len': record_len}
        # n, 4 -> n, c  ('pillar_features')
        batch_dict = self.pillar_vfe(batch_dict)
        # (n, c) -> (batch_cav_size, C, H, W) put pillars into spatial feature map ('spatial_features')
        # import ipdb; ipdb.set_trace()
        batch_dict = self.scatter(batch_dict)
        batch_dict = self.backbone(batch_dict) # 'spatial_features_2d': (batch_cav_size, 128*3, H/2, W/2)
        # N, C, H', W'. [N, 384, 100, 352]
        spatial_features_2d = batch_dict['spatial_features_2d']
        
        shape_list = torch.tensor(batch_dict['spatial_features'].shape[-3:]).to(pairwise_t_matrix.device)

        noise_pairwise_t_matrix = None
        if self.noise_flag and B==1:
            # noise_level = {'pos_std': 0.5, 'rot_std': 0, 'pos_mean': 0, 'rot_mean': 0}
            noise_pairwise_t_matrix = get_past_k_pairwise_transformation2ego(data_dict['past_lidar_pose'], self.noise_level, k=self.k, max_cav=5)[:record_len[0]].unsqueeze(0)

        # downsample feature to reduce memory
        if self.shrink_flag:
            spatial_features_2d = self.shrink_conv(spatial_features_2d)  # (B, 256, H', W')
        # compressor
        if self.compression:
            spatial_features_2d = self.naive_compressor(spatial_features_2d)

        # [B, 256, 50, 176]
        psm_single = self.cls_head(spatial_features_2d).detach()
        rm_single = self.reg_head(spatial_features_2d).detach()

        if self.use_dir:
            dm_single = self.dir_head(spatial_features_2d)

        single_detection_bbx = None

        # if self.design_mode != 4 and not self.only_tune_header_flag:
        if self.design_mode != 4:
            # generate box flow
            # [B, 256, 50, 176]
            single_output = {}
            single_output.update({'psm_single_list': self.regroup(psm_single, record_len, k), 
            'rm_single_list': self.regroup(rm_single, record_len, k)})
            if self.use_dir:
                single_output.update({
                    'dm_single_list': self.regroup(dm_single, record_len, k)
                })
            if self.viz_bbx_flag:
                box_flow_map, reserved_mask, ori_reserved_mask, single_detection_bbx, matched_idx_list, compensated_results_list = self.generate_box_flow(data_dict, single_output, dataset, shape_list, psm_single.device)
            else:
                box_flow_map, reserved_mask = self.generate_box_flow(data_dict, single_output, dataset, shape_list, psm_single.device)

        if 'flow_gt' in data_dict['label_dict']:
            flow_gt = data_dict['label_dict']['flow_gt']
            mask_gt = data_dict['label_dict']['warp_mask']
        else:
            flow_gt = None
        
        # if self.only_tune_header_flag:
        #     box_flow_map = flow_gt
        #     reserved_mask = mask_gt

        # rain attention:
        if self.multi_scale:
            if self.design_mode == 0 or self.design_mode==5:
                if self.viz_bbx_flag:
                    fused_feature, communication_rates, result_dict, single_updated_feature = self.rain_fusion(batch_dict['spatial_features'],
                    psm_single,
                    record_len,
                    pairwise_t_matrix, 
                    record_frames,
                    self.backbone,
                    [self.shrink_conv, self.cls_head, self.reg_head],
                    box_flow=box_flow_map, reserved_mask=reserved_mask,
                    flow_gt=flow_gt, viz_bbx_flag=self.viz_bbx_flag)
                else:
                    fused_feature, communication_rates, result_dict = self.rain_fusion(batch_dict['spatial_features'],
                        psm_single,
                        record_len,
                        pairwise_t_matrix, 
                        record_frames,
                        self.backbone,
                        [self.shrink_conv, self.cls_head, self.reg_head],
                        box_flow=box_flow_map, reserved_mask=reserved_mask,
                        flow_gt=flow_gt, viz_bbx_flag=self.viz_bbx_flag, noise_pairwise_t_matrix=noise_pairwise_t_matrix)
            elif self.design_mode == 4:
                fused_feature, communication_rates, result_dict = self.rain_fusion(batch_dict['spatial_features'],
                    psm_single,
                    record_len,
                    pairwise_t_matrix, 
                    record_frames,
                    self.backbone,
                    [self.shrink_conv, self.cls_head, self.reg_head])
            else: 
                fused_feature, communication_rates, result_dict, flow_recon_loss = self.rain_fusion(batch_dict['spatial_features'],
                    psm_single,
                    record_len,
                    pairwise_t_matrix, 
                    record_frames,
                    self.backbone,
                    [self.shrink_conv, self.cls_head, self.reg_head],
                    box_flow=box_flow_map, reserved_mask=reserved_mask,
                    flow_gt=flow_gt)
            # downsample feature to reduce memory
            if self.shrink_flag:
                fused_feature = self.shrink_conv(fused_feature)
                if self.single_supervise:
                    single_feature = self.shrink_conv(single_feature)

        else:
            fused_feature, communication_rates, result_dict = self.rain_fusion(spatial_features_2d,
                                            psm_single,
                                            record_len,
                                            pairwise_t_matrix,
                                            record_frames)
            if self.compensation:
                if self.single_supervise:
                    fused_feature, single_feature, communication_rates, all_recon_loss, result_dict = self.rain_fusion(spatial_features_2d,
                                                psm_single,
                                                record_len,
                                                pairwise_t_matrix, 
                                                record_frames,
                                                self.backbone,
                                                [self.shrink_conv, self.cls_head, self.reg_head])
                else:
                    fused_feature,fused_feature_curr,fused_feature_latency, communication_rates, all_recon_loss, all_latency_recon_loss, result_dict = self.rain_fusion(spatial_features_2d,
                                                psm_single,
                                                record_len,
                                                pairwise_t_matrix, 
                                                record_frames,
                                                self.backbone,
                                                [self.shrink_conv, self.cls_head, self.reg_head])            

        
        # print('fused_feature: ', fused_feature.shape)
        if self.only_tune_header_flag:
            psm = self.fused_cls_head(fused_feature)
            rm = self.fused_reg_head(fused_feature)
        else: 
            psm = self.cls_head(fused_feature)
            rm = self.reg_head(fused_feature)
            # psm = self.fused_cls_head(fused_feature)
            # rm = self.fused_reg_head(fused_feature)
        
        output_dict = {'psm': psm,
                       'rm': rm}

        if self.use_dir:
            # dm = self.dir_head(fused_feature)
            dm = self.fused_dir_head(fused_feature)
            output_dict.update({'dm': dm})

        if self.compensation:
            if self.single_supervise:
                psm_nonego_single = self.cls_head(single_feature)
                rm_nonego_single = self.reg_head(single_feature)
                output_dict.update({
                    'psm_nonego_single': psm_nonego_single,
                    'rm_nonego_single': rm_nonego_single
                })
            
            output_dict.update({
                'recon_loss': all_recon_loss, 
                'record_len': record_len
            })

        output_dict.update({'psm_single': psm_single,
                       'rm_single': rm_single,
                       'comm_rate': communication_rates
                       })

        if self.viz_bbx_flag:
            output_dict.update({
                'single_detection_bbx': single_detection_bbx, 
                'matched_idx_list': matched_idx_list, 
                'compensated_results_list': compensated_results_list
            })
            _, C, H, W = batch_dict['spatial_features'].shape
            output_dict.update({
                'single_updated_feature': single_updated_feature,
                'single_original_feature': batch_dict['spatial_features'].reshape(-1, self.k, C, H, W)[:, 0, :, :, :], 
                'single_flow_map': box_flow_map, 
                'single_reserved_mask': reserved_mask, 
                'single_original_reserved_mask': ori_reserved_mask
            })

        if self.design_mode == 1:
            output_dict.update({'flow_recon_loss': flow_recon_loss})
        
        output_dict.update(result_dict) 
        
        return output_dict
